# Supplementary material
Source: PubMed Central journal article supplement (PMC7042841)
Supplement: jama-323-519-s003.pdf [file jama-323-519-s003.pdf]

1 WHIST - Changes to the original REC approved protocol

2

3 All protocol versions can be found at

4 <https://www.journalslibrary.nihr.ac.uk/programmes/hta/1419914#/>.

5 See table for the summary of changes implemented with each protocol version.

6 **Table Protocol versions and summary of changes from the previous version**

---

| <b>Version and date</b> | <b>Summary of changes</b>                                                                                                                                                                                                                                                                                                                                                                                                                                                                                                                            |
|-------------------------|------------------------------------------------------------------------------------------------------------------------------------------------------------------------------------------------------------------------------------------------------------------------------------------------------------------------------------------------------------------------------------------------------------------------------------------------------------------------------------------------------------------------------------------------------|
| V2 - 08 Feb 2016        | <ul style="list-style-type: none"><li>• None. This was the first version approved by IRAS and given to recruiting centres.</li></ul>                                                                                                                                                                                                                                                                                                                                                                                                                 |
| V3 – 13 Oct 2016        | <ul style="list-style-type: none"><li>• The collection of copies of routinely taken x-rays was no longer required.</li><li>• The TARN Injury Severity Score classification range was changed to include all major trauma injuries as it had been noted that participants can have a major trauma or be TARN eligible with an ISS score below 9, therefore we participants were then stratified to an ISS score of <math>\leq 15</math> (rather than 9-15) or <math>\geq 16</math>.</li></ul>                                                         |
| V4 – 21 Feb 2017        | <ul style="list-style-type: none"><li>• A clarification on the consent process via professional nominated consultee agreement was provided.</li><li>• Changes in the process of handling personal data were made. Confidential data must be sent either by a secure email or by recorded delivery.</li><li>• A nested study within WHIST was proposed with the aim to investigate the possible underlying molecular mechanisms used by NPWT if wound healing improvement and a reduced surgical site infection incidence was demonstrated.</li></ul> |
| V5 – 27 Jun 2017        | <ul style="list-style-type: none"><li>• Minor wording to the eligibility criteria was amended:<ol style="list-style-type: none"><li>1) Participants had to present to the “trial hospital” within 72 hours and this was changed to had to present “to hospital”</li></ol></li></ul>                                                                                                                                                                                                                                                                  |

---

within 72 hours as some participants were referred to the trial hospital from other Trauma Centres within 72 hours but were unable to be transferred for primary surgery until a bed became available.

- 2) Participants had to have “a major trauma as defined by eligibility for the UK Trauma Audit Research Network (TARN) database”. This was reworded to “have a major trauma injury and/or TARN eligible injury; as defined.....” as some specific high energy injuries, e.g. pilon and tibial plateau fractures, are always at risk but may not be included in TARN.
- A secondary objective was added. This was to quantify the long-term (five year) chronic neuropathic pain using the Douleur Neuropathique 4 Questionnaire (DN4).
