# Supplementary material
Source: PubMed Central journal article supplement (PMC7042841)
Supplement: jama-323-519-s004.pdf [file jama-323-519-s004.pdf]

## **Data Sharing Statement**

Costa. Effect of Incisional Negative Pressure Wound Therapy vs Standard Wound Dressing on Deep Surgical Site Infection After Surgery for Lower Limb Fractures Associated With Major Trauma. *JAMA*. Published February 11, 2020. 10.1001/jama.2020.0059

### **Data**

**Data available:** No
